# Supplementary material
Source: publisher site journal article supplement (https://www.dovepress.com/article/427207)
Supplement: Supplementary file 1 [file get_supplementary_file.php]

## Supplementary file 1

### Monotonicity plots for scale 1


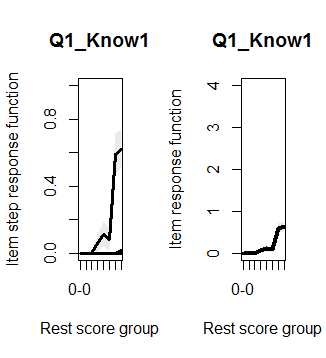

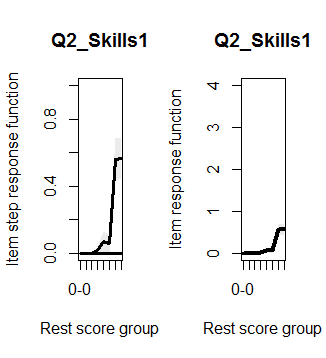

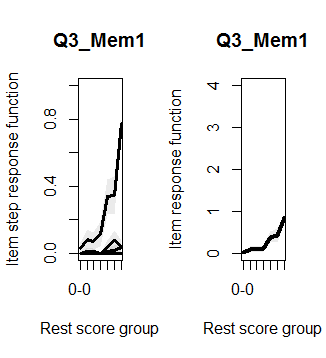


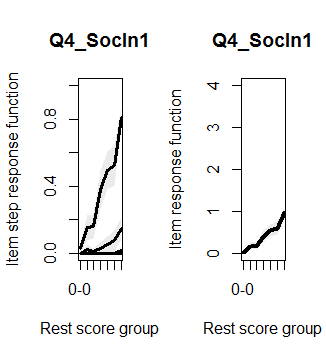

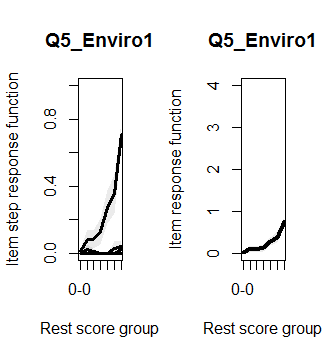

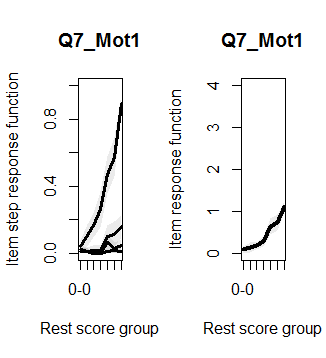


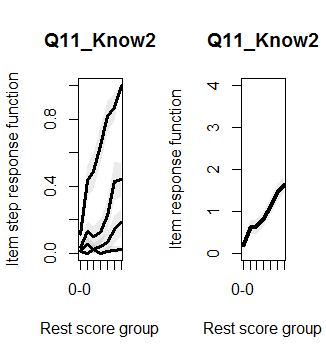

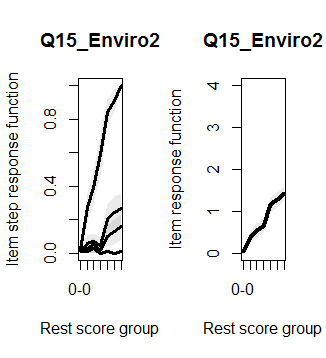

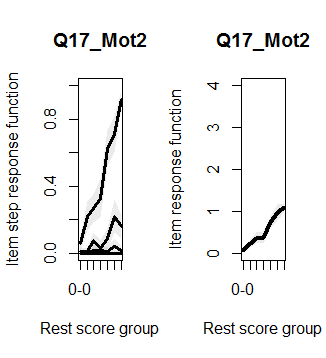


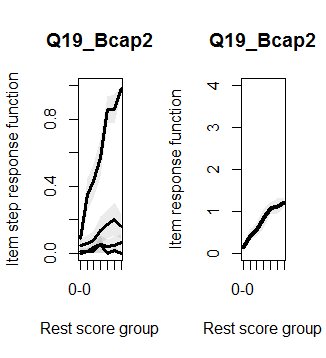

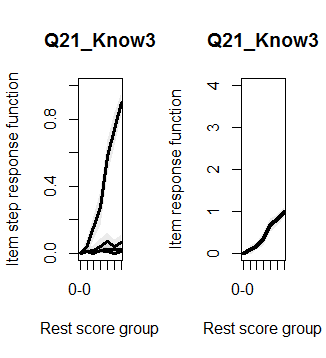

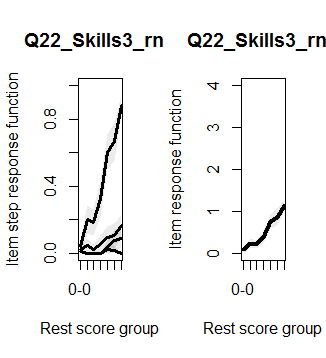


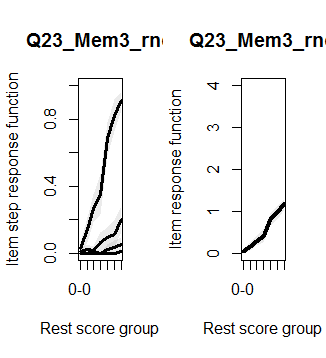

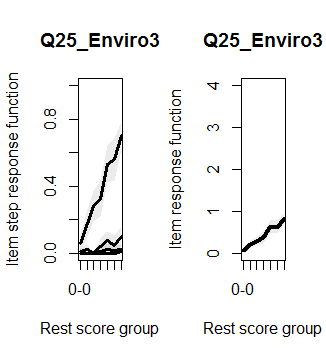

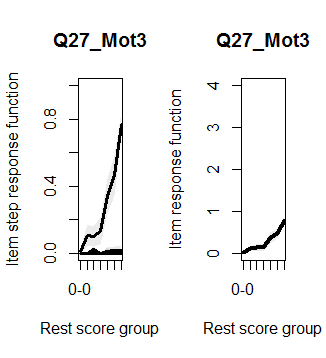


### Monotonicity plots for scale 2


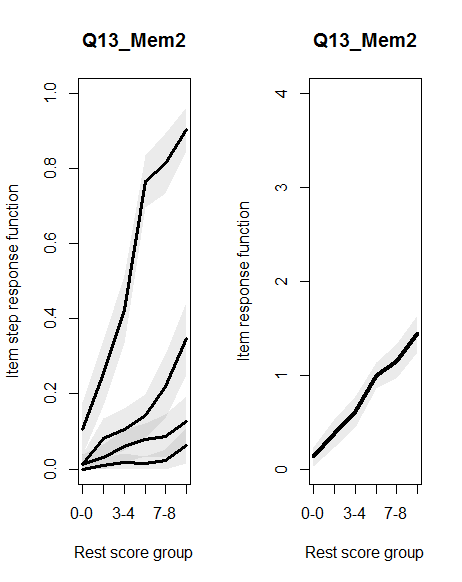

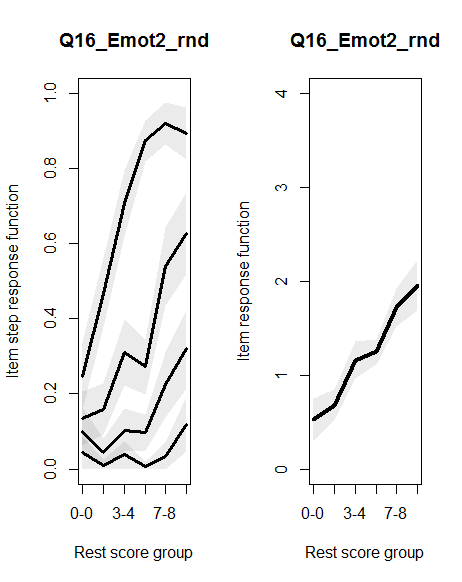

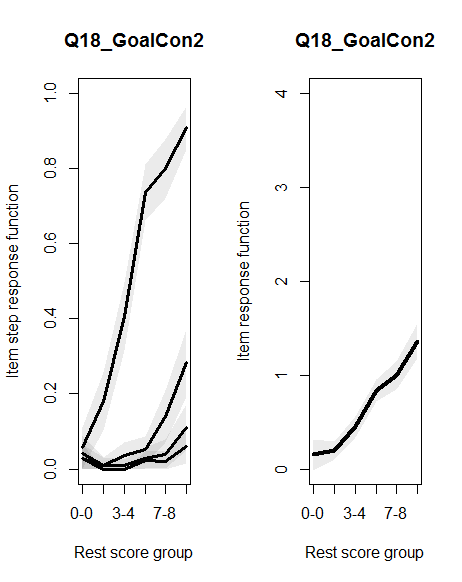


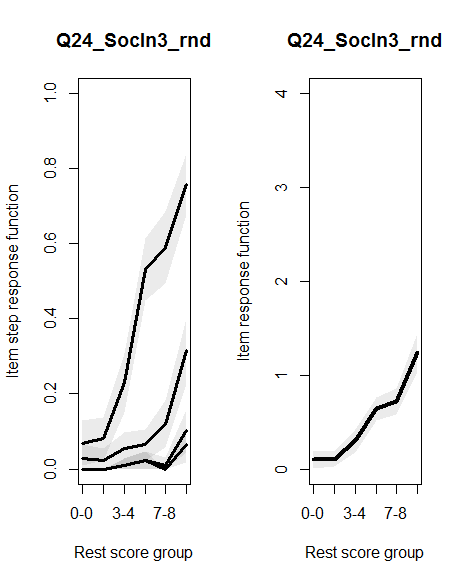

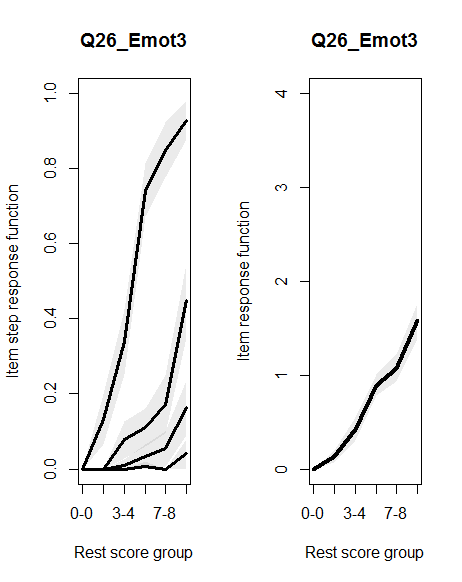

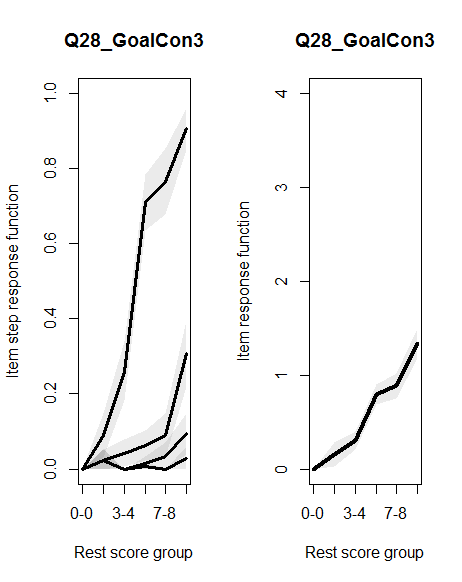


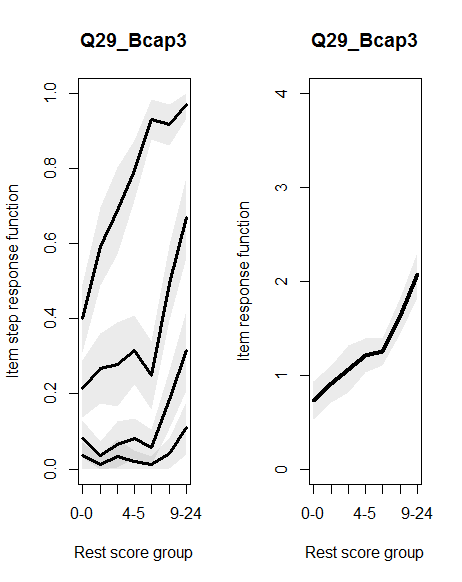


**Supplementary file 2**


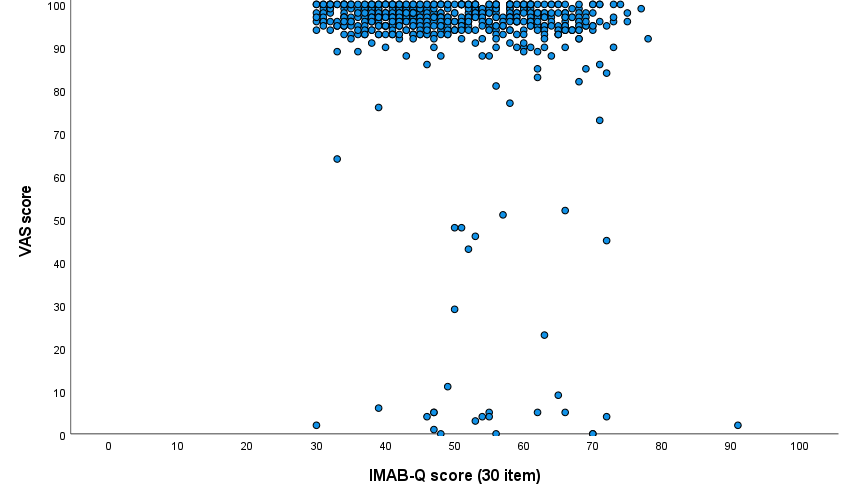


Graphical representation of Spearman’s Rho for IMAB-Q 30 total score and 100mm Visual Analogue Scale


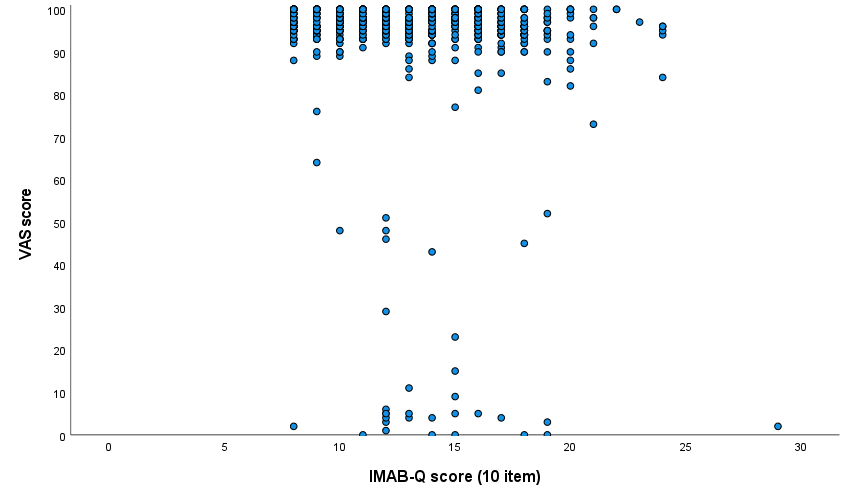


Graphical representation of Spearman’s Rho for IMAB-Q 10 total score and 100mm Visual Analogue Scale
